# Supplementary material
Source: MDPI journal article supplement (https://www.mdpi.com/2073-4344/12/11/1467)
Supplement: s1 [file s1]

# **Magnetron sputtered Al co-doped with Zr-Fe<sub>2</sub>O<sub>3</sub> photoanode with fortuitous Al<sub>2</sub>O<sub>3</sub> passivation layer for lowering the onset potential for PEC solar water splitting**

Tae Sik Koh<sup>1,†</sup>, Periyasamy Anushkaran<sup>1,†</sup>, Jun Beom Hwang<sup>1</sup>, Sun Hee Choi<sup>2</sup>, Weon-Sik Chae<sup>3</sup>, Hyun Hwi Lee<sup>2,\*</sup> and Jum Suk Jang<sup>1,\*</sup>

<sup>1</sup> Division of Biotechnology, College of Environmental and Bioresource Sciences, Jeonbuk National University, Iksan, 54596, Republic of Korea

<sup>2</sup> Pohang Accelerator Laboratory, POSTECH, Pohang 37673, Korea.

<sup>3</sup> Daegu Center, Korea Basic Science Institute, Daegu 41566, Republic of Korea.

\*Correspondence: hhleec@postech.ac.kr (H.H.L.); jangjs75@jbnu.ac.kr (J.S.J.)

† These authors contribute equally.

### 1.1. Characterization

In order to examine the purity and crystallinity of as-synthesized photoanode samples, synchrotron X-ray diffraction (SR-XRD) measurements were conducted at BL5A beamline of PLS-II (Pohang Light Source II) in Korea. The local structure of Fe in  $x$ :Al-Zr/HT photoanodes was investigated by Extended x-ray absorption fine structure (EXAFS) spectroscopy. Fluorescence spectra for Fe K-edge ( $E_0=7,112$  eV) were taken at BL7D beamline of PLS-II in Korea. The obtained data were background-removed, normalized and Fourier-transformed. The morphology of all samples was observed using high resolution field-emission scanning electron microscopy (HR-FESEM, Hitachi SU8230, Korean Basic Science Institute) and high-resolution transmission electron microscopy (HR-TEM, Center for University-wide Research Facilities (CURF) at Jeonbuk National University) observations were carried out. X-ray photoelectron spectroscopy (XPS) measurement were performed on a PHI Quantera II spectrometer using a monochromatic AlK $\alpha$  X-ray source (Kongju National University) and the binding energy was calibrated by the adventitious carbon peak of C 1s at 284.8 eV. The optical properties of the as-prepared photoanodes were evaluated by ultraviolet-visible absorption spectra using a UV-Vis spectrophotometer (UV-2600, Shimadzu). The band gap energy of the photoanode was determined from an indirect transition of the Tauc method [1]:

$$(\alpha h\nu)^{1/n} = A(h\nu - E_g) \quad (S1)$$

where,  $\alpha$  is the absorption coefficient,  $h$  is Planck's constant,  $\nu$  is the photon frequency,  $A$  is a proportionality constant,  $E_g$  is the optical bandgap, and  $n$  is an exponent that depends on the nature of the electronic transitions. Since hematite is an indirect bandgap semiconductor, the value of  $n$  is 2.

### 1.2. Photoelectrochemical (PEC) measurements

PEC measurements were performed with an Ivium CompactStat potentiostat (Ivium Instruments, The Netherlands) in a three-electrode electrochemical cell using the prepared  $\alpha$ -Fe<sub>2</sub>O<sub>3</sub> as the working electrode, Pt wire as the counter electrode and Hg/HgO as the reference electrode. An aqueous solution of 1 M NaOH (pH = 13.6) was used as the electrolyte. Current density-potential characteristics were measured by an Ivium CompactStat potentiostat with illumination using a solar simulator with the standard global solar light (AM 1.5G, 100 mW cm<sup>-2</sup>). The potential was calculated against the reversible hydrogen electrode (RHE) by using the following Nernst equation:

$$E_{\text{RHE}} = E_{\text{Hg/HgO}} + 0.059\text{pH} + E_{\text{Hg/HgO}}^0 \quad (S2)$$

$$(E_{\text{Hg/HgO}}^0 = 0.095 \text{ V at } 25^\circ\text{C})$$

Current density-Potential curves were obtained from 0.3 to 1.7 V vs. RHE with a scan rate of 50 mV s<sup>-1</sup>. The Nyquist plots calculated from electrochemical impedance spectroscopy (EIS) were measured over the frequency range from 3000 kHz to 0.5 Hz under a 1-sun illumination condition. The Mott-Schottky plots were measured in dark condition at a frequency of 100 Hz to understand the donor density ( $N_D$ ) and flat band potential based on the following equation [2]:

$$1/C^2 = \frac{2}{q\epsilon\epsilon_0 N_D A^2} (V - E_{\text{FB}} - k_B T/q) \quad (\text{S3})$$

where,  $q$  is the electron charge ( $1.602 \times 10^{-19}$  C),  $\epsilon$  is the dielectric constant of hematite (80),  $\epsilon_0$  is the permittivity of vacuum ( $8.854 \times 10^{-12}$  F m<sup>-1</sup>),  $E_{\text{FB}}$  is the flat band potential,  $k_B$  is the Boltzmann constant ( $1.38 \times 10^{-23}$  J K<sup>-1</sup>),  $T$  is the temperature and  $C$  is the capacitance derived from the electrochemical impedance obtained at each potential (V). The intensity modulated photocurrent spectroscopy (IMPS) study was performed using a blue LED by a frequency-response analyzer with the peak wavelength of 520 nm. The bulk charge separation efficiency ( $\eta_{\text{bulk}}$ ) and surface charge separation efficiency ( $\eta_{\text{surface}}$ ) of as-synthesized photoanodes were measured by the addition of 0.5 M H<sub>2</sub>O<sub>2</sub> in 1 M NaOH electrolyte solution. The photocurrent density in the presence of H<sub>2</sub>O<sub>2</sub> could represent the number of separated charges that successfully reach the electrode surface without recombination in the bulk, since H<sub>2</sub>O<sub>2</sub> has a faster oxidation rate and a lower overpotential than that of H<sub>2</sub>O. The  $\eta_{\text{bulk}}$  and  $\eta_{\text{surface}}$  were calculated by following equations [3]:

$$J_{\text{H}_2\text{O}} = J_{\text{abs}} \times \eta_{\text{bulk}} \times \eta_{\text{surface}} \quad (\text{S4})$$

$$J_{\text{H}_2\text{O}_2} = J_{\text{abs}} \times \eta_{\text{bulk}} \quad (\text{S5})$$

$$\eta_{\text{bulk}} = J_{\text{H}_2\text{O}_2} / J_{\text{abs}} \times 100 \quad (\text{S6})$$

$$\eta_{\text{surface}} = J_{\text{H}_2\text{O}} / J_{\text{H}_2\text{O}_2} \times 100 \quad (\text{S7})$$

where,  $J_{\text{H}_2\text{O}}$  is the measured photocurrent density,  $J_{\text{abs}}$  is the photon absorption expressed as a current density (i.e., absorbed photon-to-current efficiency APCE =100%), and  $J_{\text{H}_2\text{O}_2}$  is the photocurrent density in the presence of H<sub>2</sub>O<sub>2</sub>.

**Table S1.** Comparative photocurrents density results of hematite photoanodes at 1.23 V vs. RHE with previous studies.

| Photoanode Materials                                        | Photocurrent without<br>surface modification<br>(mA cm <sup>-2</sup> at 1.23 V <sub>RHE</sub> ) | Photocurrent after<br>surface modification<br>(mA cm <sup>-2</sup> at 1.23 V <sub>RHE</sub> ) | Ref.             |
|-------------------------------------------------------------|-------------------------------------------------------------------------------------------------|-----------------------------------------------------------------------------------------------|------------------|
| Al-Fe <sub>2</sub> O <sub>3</sub>                           | 1.00                                                                                            | -                                                                                             | [4]              |
| FeNiOOH-FeF <sub>x</sub> /Zr-Fe <sub>2</sub> O <sub>3</sub> | 1.69                                                                                            | 2.81                                                                                          | [5]              |
| Zr-Fe <sub>2</sub> O <sub>3</sub> /NiFe MOF                 | 1.41                                                                                            | 2.19                                                                                          | [6]              |
| F-FeOOH/Zr-Fe <sub>2</sub> O <sub>3</sub>                   | 1.65                                                                                            | 2.11                                                                                          | [7]              |
| CoPi:(F,Zr)-Fe <sub>2</sub> O <sub>3</sub>                  | 1.91                                                                                            | 2.29                                                                                          | [8]              |
| (Ti,Zr)-Fe <sub>2</sub> O <sub>3</sub>                      | 1.51                                                                                            | -                                                                                             | [9]              |
| (Zr,Sn)-Fe <sub>2</sub> O <sub>3</sub>                      | 1.64                                                                                            | -                                                                                             | [10]             |
| CoPi:(Ti,Al)-Fe <sub>2</sub> O <sub>3</sub>                 | 1.32                                                                                            | 1.60                                                                                          | [11]             |
| (F,Ti)-Fe <sub>2</sub> O <sub>3</sub>                       | 1.61                                                                                            | -                                                                                             | [12]             |
| (Ti,Zn)-Fe <sub>2</sub> O <sub>3</sub>                      | 1.02                                                                                            | -                                                                                             | [13]             |
| <b>CoPi:Al/Zr-Fe<sub>2</sub>O<sub>3</sub></b>               | <b>1.85</b>                                                                                     | <b>1.98</b>                                                                                   | <b>This work</b> |

**Table S2.** Electrochemical impedance spectroscopy (EIS) fitting parameters at 1.0 V vs. RHE for Zr/HT, 2:Al-Zr/HT, 6:Al-Zr/HT and 10:Al-Zr/HT photoanodes.

| Samples     | $R_s (\Omega)$ | $R_1 (\Omega)$ | $CPE_1 (\mu F)$ | $R_2 (\Omega)$ | $CPE_2 (\mu F)$ |
|-------------|----------------|----------------|-----------------|----------------|-----------------|
| Zr/HT       | 36.24          | 41.28          | 41.88           | 137.8          | 899.2           |
| 2:Al-Zr/HT  | 20.5           | 61.74          | 46.51           | 68.29          | 1089            |
| 6:Al-Zr/HT  | 21.4           | 67.01          | 31.50           | 68.31          | 837.4           |
| 10:Al-Zr/HT | 32.94          | 57.06          | 37.30           | 80.97          | 1105            |

**Table S3.** PL lifetime parameters of the examined Zr/HT, 2:Al-Zr/HT, 6:Al-Zr/HT and 10:Al-Zr/HT photoanodes.

| Samples     | $A_1 (\%)$ | $\tau_1 (\text{ns})$ | $A_2 (\%)$ | $\tau_2 (\text{ns})$ | $A_3 (\%)$ | $\tau_3 (\text{ns})$ | $\langle \tau \rangle^{\text{a)}} (\text{ns})$ |
|-------------|------------|----------------------|------------|----------------------|------------|----------------------|------------------------------------------------|
| Zr/HT       | 67.5       | 0.05                 | 31.4       | 0.28                 | 1.1        | 2.9                  | 0.77                                           |
| 2:Al-Zr/HT  | 69.9       | 0.05                 | 29.8       | 0.24                 | 0.3        | 3.7                  | 0.53                                           |
| 6:Al-Zr/HT  | 61.5       | 0.05                 | 37.7       | 0.27                 | 0.8        | 2.5                  | 0.51                                           |
| 10:Al-Zr/HT | 60.8       | 0.06                 | 38.0       | 0.29                 | 1.2        | 2.1                  | 0.51                                           |

The time-resolved PL intensity is defined by  $I(t) = \sum A_i e^{-t/\tau_i}$ , where  $I(t)$  is the PL intensity as a function of time,  $A$  is the amplitude,  $\tau$  is the PL lifetime, and  $i$  is the subcomponent number of lifetime [14-16] <sup>a)</sup> The intensity-weighted average lifetime is calculated by the following equation:

$$\langle \tau \rangle = \sum_i A_i \tau_i^2 / \sum_i A_i \tau_i.$$

**Table S4.** Frequency at the minimum imaginary component ( $f_{\min}$ ) and average electron transport time in the IMPS spectra for Zr/HT, 2:Al-Zr/HT, 6:Al-Zr/HT and 10:Al-Zr/HT photoanodes.

| Samples     | $f_{\min}$ (Hz) | Electron transport time ( $\mu$ s) |
|-------------|-----------------|------------------------------------|
| Zr/HT       | 316.0           | 504                                |
| 2:Al-Zr/HT  | 595.7           | 267                                |
| 6:Al-Zr/HT  | 188.4           | 845                                |
| 10:Al-Zr/HT | 251.2           | 634                                |

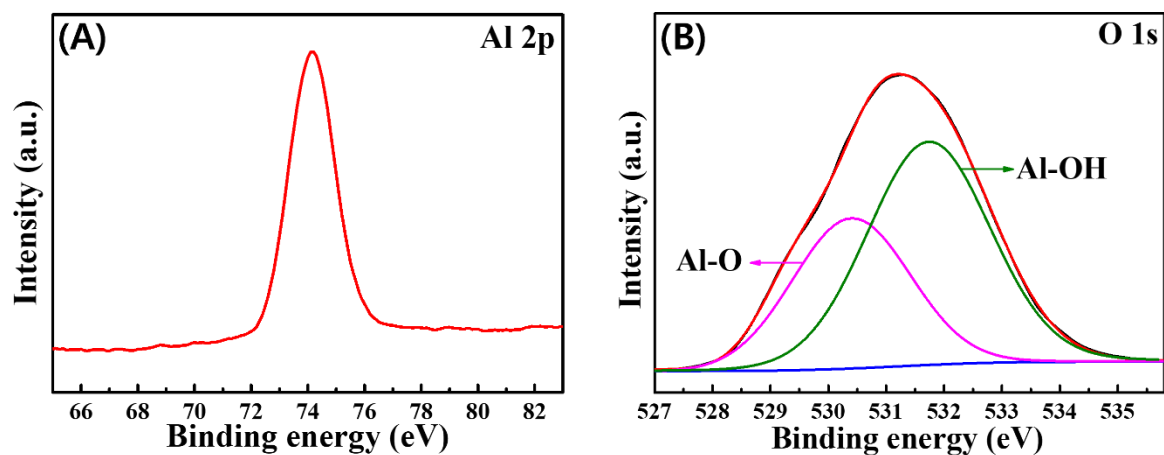

**Figure S1.** The XPS spectra of (A) Al 2p and (B) O 1s for 2nm Al/Zr-FeOOH.

As can be seen from Figure S1A, the binding energies of Al 2p peak positioned at 74.1 eV corresponds to  $\text{Al}_2\text{O}_3$  composition [17]. The O 1s peak is deconvoluted into two major peaks: one at 531.7 eV, consistent to Al–OH bonds and the other at 530.4 eV associated with Al–O bonds peak [18,19].

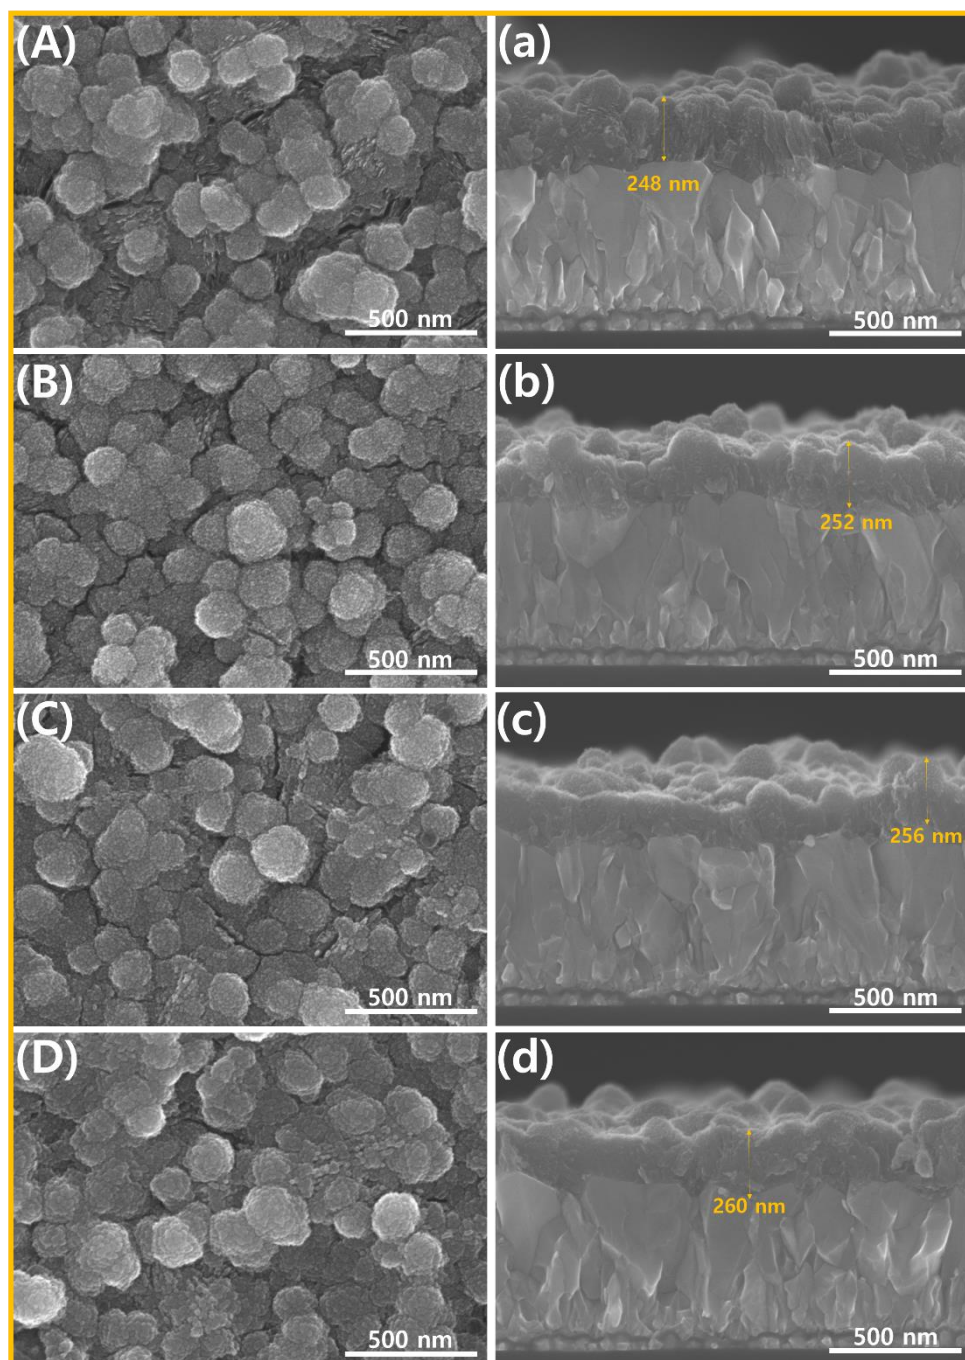

**Figure S2.** FESEM image (top and cross-sectional view) of Al deposited photoanode before quenching. (A,a) Zr-FeOOH, (B,b) 2nm Al/Zr-FeOOH, (C,c) 6nm Al/Zr-FeOOH, (D,d) 10nm Al/Zr-FeOOH.



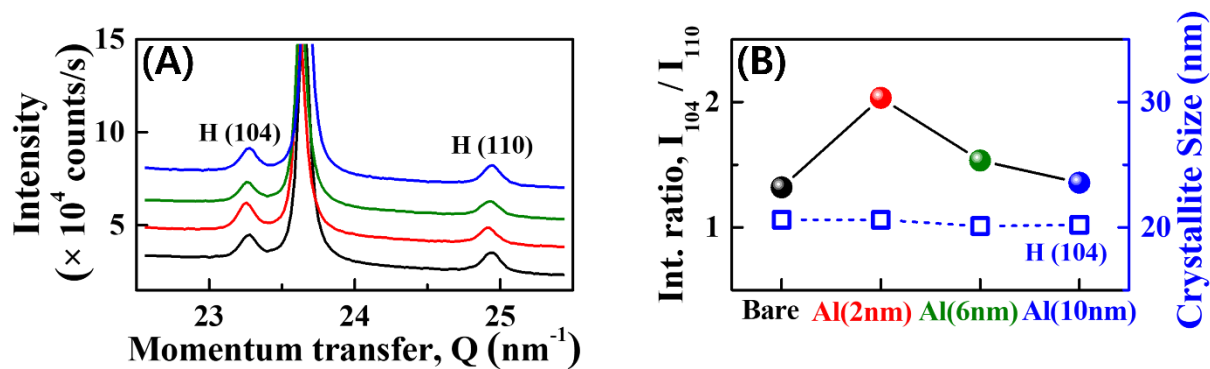

**Figure S3.** (A) Diffraction profiles near the two major H(104) and H(110) peaks. (B) Integrated intensity ratio (solid circles) of H(104) vs. H(110) peak and the crystallite size (dashed blue squares) calculated from the H(104) peak.

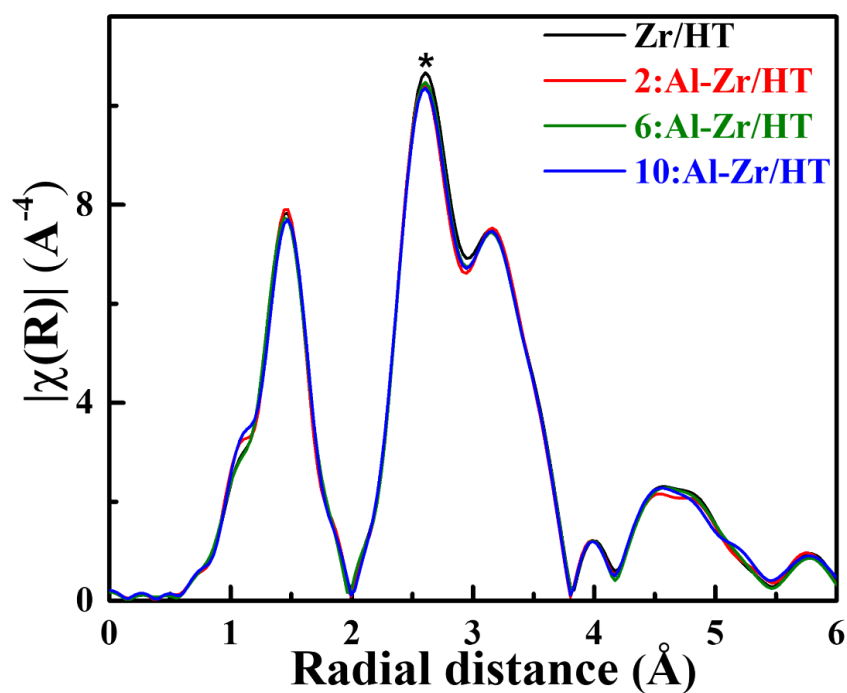

**Figure S4.** Fourier-transformed spectra of  $k^3$ -weighted EXAFS functions for the Fe K-edges of  $x$ :Al-Zr/HT photoanodes.

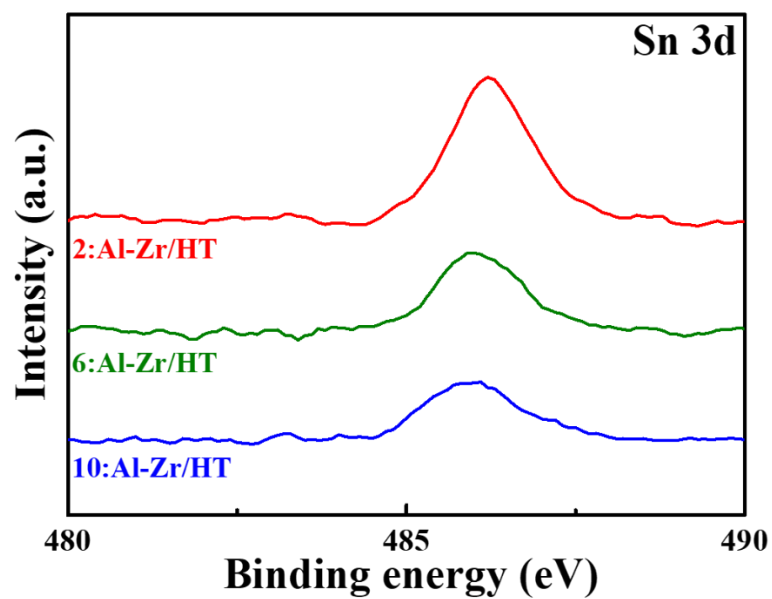

**Figure S5.** XPS narrow scan spectra of Sn 3d  $x$ :Al-Zr/HT photoanodes.

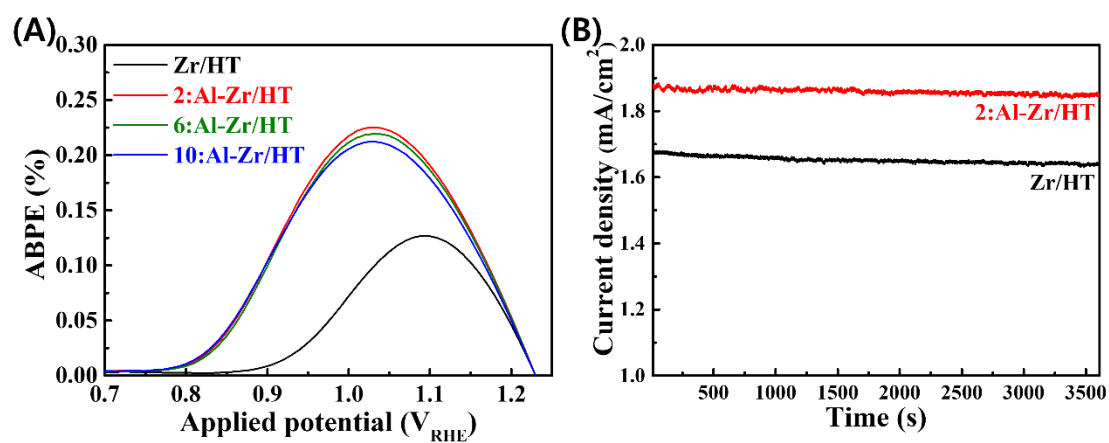

**Figure S6.** (A) ABPE as a function of applied potential for Zr/HT and  $x$ :Al-Zr/HT photoanodes and (B) long-term stability at 1.23 V vs. RHE using 1 M NaOH electrolyte for Zr/HT and  $x$ :Al-Zr/HT photoanodes.

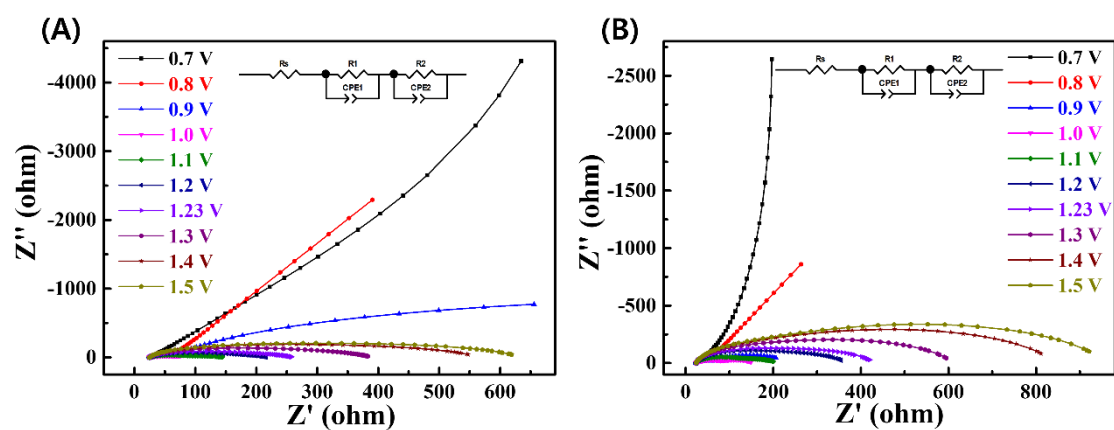

**Figure S7.** Nyquist plots for (A) Zr/HT and (B) 2:Al-Zr/HT photoanodes obtained at 0.7 – 1.5  $V_{RHE}$  (inset: corresponding equivalent circuit model for EIS fitting).

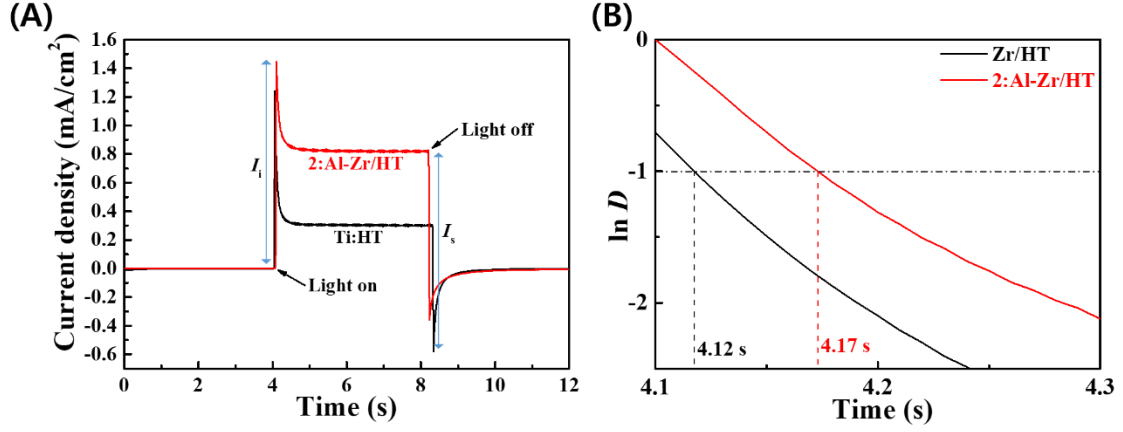

**Figure S8.** (A) Transient photocurrent response and (B) anodic transient decay time of Zr/HT and 2:Al-Zr/HT photoanode measured at 1.0 V<sub>RHE</sub> in 1 M NaOH electrolyte under 1-sun illumination condition.

The anodic transient decay time is estimated using the following equation [20]:

$$D = \frac{(I_t - I_s)}{(I_i - I_s)} \quad (\text{S8})$$

where,  $I_t$ ,  $I_s$  and  $I_i$  are the time-dependent, steady-state, and initial photocurrent, respectively, as shown in Figure S8A. The transient time constant ( $\tau$ ) is defined as the time when  $\ln D = -1$  in the normalized plots of  $\ln D-t$  (Figure S8B).

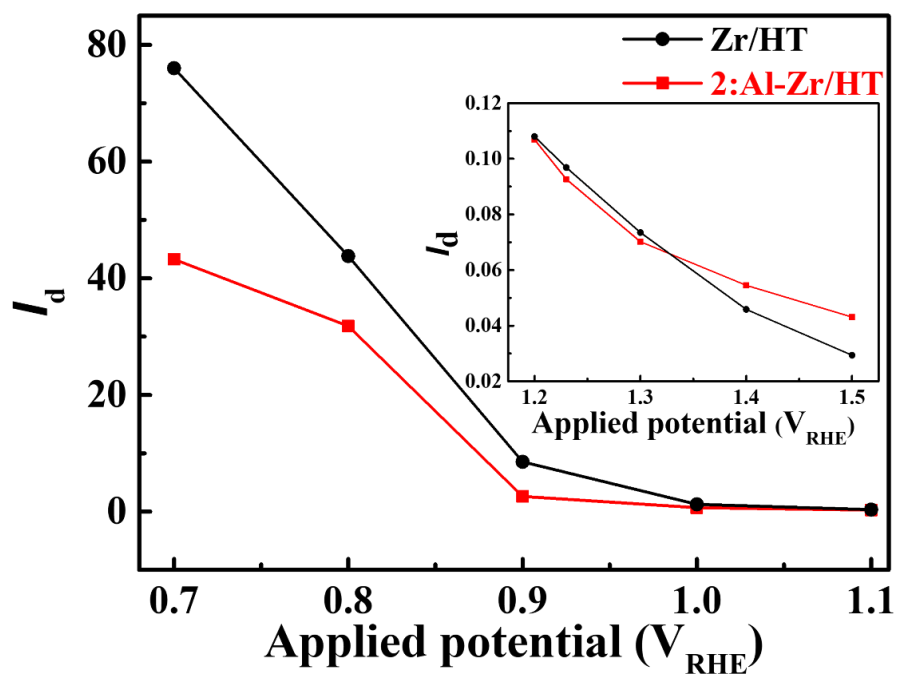

**Figure S9.** The plots of  $I_d$  values vs. Potential for Zr/HT and 2:Al-Zr/HT photoanode. The low  $I_d$  indicates fast charge transfer at the interface of electrode/electrolyte.

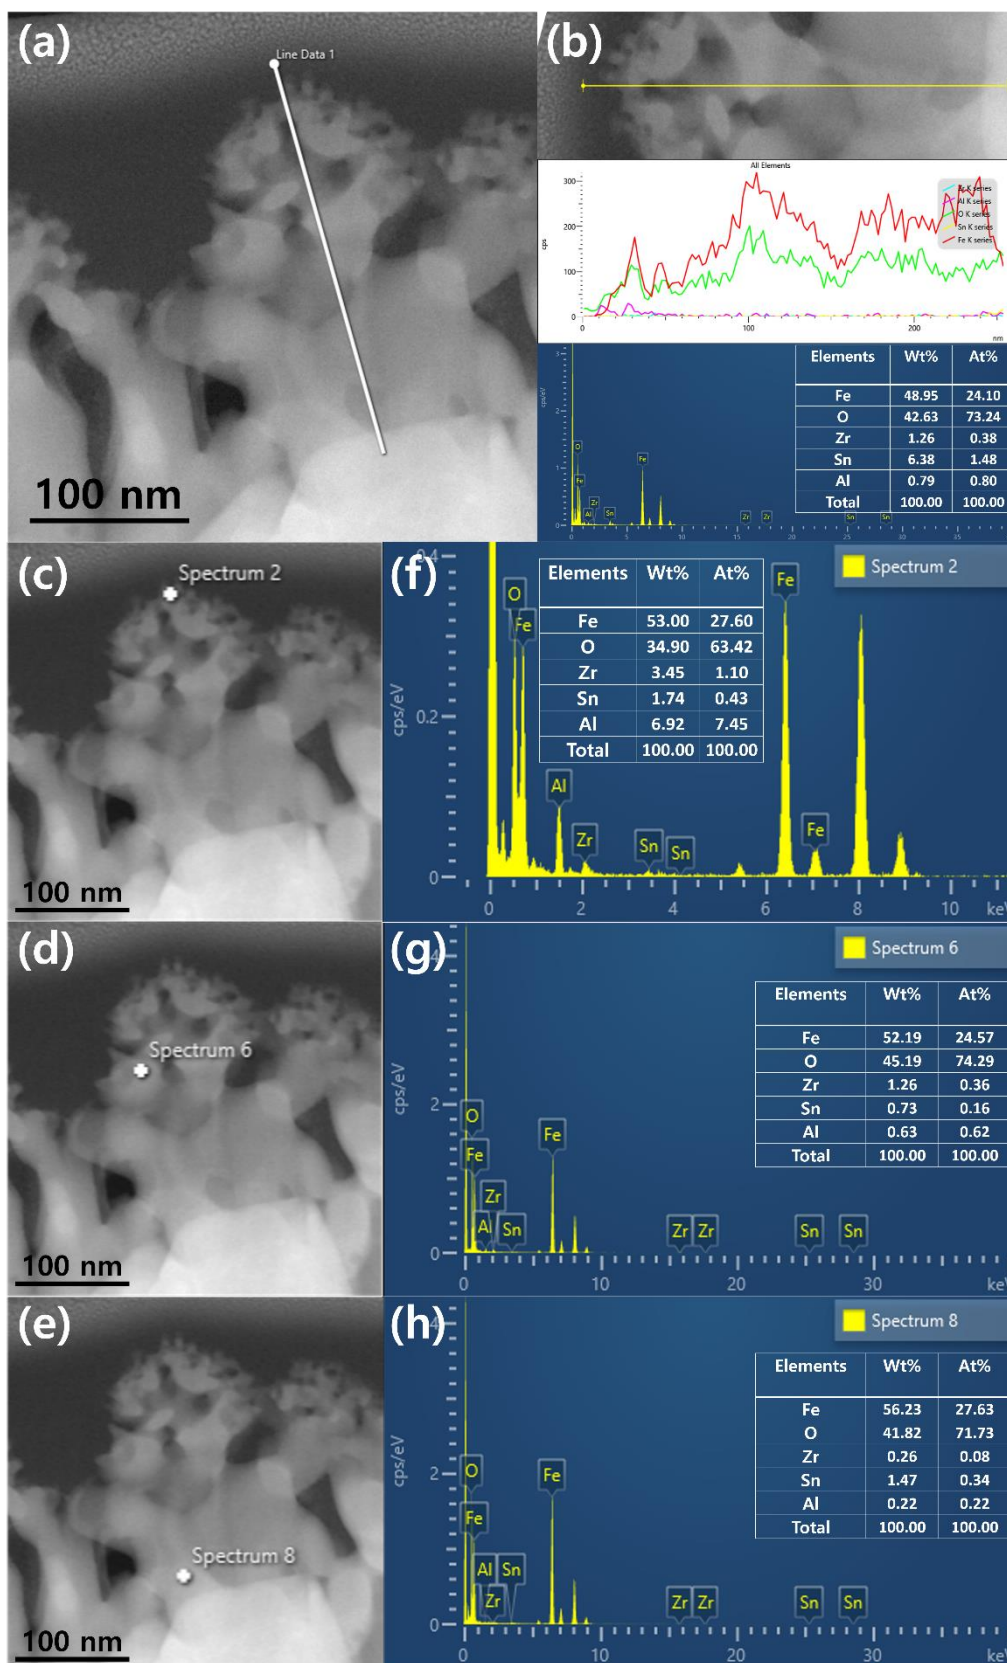

**Figure S10.** The TEM dark image 2:Al-Zr/HT photoanode indicates the EDS line scan position (a–b), and point scanning (c–h).

## Reference

1. M. Saeidi, A. Yourdkhani, S.A.S. Ebrahimi, R. Poursalehi, Candle flame-treatment as an effective strategy to enhance the photoelectrochemical properties of Ti-doped hematite thin films, *J. Mater. Chem. C* **2020**, *8*, 11950–11961.
2. H. Zhang, Y.K. Kim, H.Y. Jeong, J.S. Lee, A few atomic FeNbO<sub>4</sub> overlayers on hematite nanorods: Microwave-induced high temperature phase for efficient photoelectrochemical water splitting, *ACS Catal.* **2018**, *9*, 1289–1297.
3. Y. Lan, Z. Liu, Z. Guo, M. Ruan, Y. Xin, Accelerating the charge separation of ZnFe<sub>2</sub>O<sub>4</sub> nanorods by Cu-Sn ions gradient doping for efficient photoelectrochemical water splitting, *J. Colloid Interface Sci.* **2019**, *552*, 111–121.
4. Kleiman-Shwarscstein, A.; Huda, M.N.; Walsh, A.; Yan, Y.; Stucky, G.D.; Hu, Y.S.; Al-Jassim, M.M.; McFarland, E.W. Electrodeposited aluminum-doped  $\alpha$ -Fe<sub>2</sub>O<sub>3</sub> photoelectrodes: experiment and theory. *Chem. Mater.* **2010**, *22*, 510-517.
5. Zhao, X.; Lu, C.; Li, S.; Chen, Y.; Zhang, G.; Zhang, D.; Feng, K.; Zhong, J. FeFx and Fe<sub>2</sub>ZrO<sub>5</sub> Co-modified hematite for highly efficient solar water splitting. *J. Energy Chem.* **2022**, *69*, 414-420.
6. Wang, P.; Wang, S.; Gao, L.; Long, X.; Chai, H.; Li, F.; Wang, Q.; Jin, J. Achieving surface-sealing of hematite nanoarray photoanode with controllable metal–organic frameworks shell for enhanced photoelectrochemical water oxidation. *J. Catal.* **2022**, *413*, 398-406.
7. Wang, T.; Gao, L.; Wang, P.; Long, X.; Chai, H.; Li, F.; Jin, J. Dual-doping in the bulk and the surface to ameliorate the hematite anode for photoelectrochemical water oxidation. *J. Colloid Interface Sci.* **2022**, *624*, 60-69.
8. Dhandole, L.K.; Anushkaran, P.; Chae, W.S.; Chung, H.S.; Lee, H.H.; Choi, S.H.; Cho, M.; Jang, J.S. Efficient charge transfers in hematite photoanode integrated by fluorine and zirconia co-doping for photoelectrochemical water splitting. *Chem. Eng. J.* **2022**, *446*, 136957.
9. Sun, Z.; Fang, G.; Li, J.; Mo, J.; He, X.; Wang, X.; Yu, Z. Preparation of (Ti, Zr) co-doped hematite photoanode for enhanced photoelectrochemical water splitting. *Chem. Phys. Lett.* **2020**, *754*, 137736.
10. Chen, D.; Liu, Z.; Dua-axial gradient doping (Zr and Sn) on hematite for promoting charge separation in photoelectrochemical water splitting. *ChemSusChem* **2018**, *11*, 3438-3448.
11. Hwang, J.B.; Dhandole, L.K.; Anushkaran, P.; Chae, W.S.; Choi, S.H.; Lee, H.H.; Jang, J.S. Microwave-assisted surface attachment of aluminium ions on in situ diluted titanium-doped hematite photoanodes for efficient photoelectrochemical water-splitting. *Sustain. Energy Fuels* **2022**, *6*, 3056-3067.
12. Kang, K.; Zhang, H.; Kim, J.H.; Byun, W.J.; Lee, J.S. An in situ fluorine and ex situ titanium two-step co-doping strategy for efficient solar water splitting by hematite photoanodes. *Nanoscale Adv.* **2022**, *4*, 1659-1667.
13. Zhu, Q.; Yu, C.; Zhang, X. Ti, Zn co-doped hematite photoanode for solar driven photoelectrochemical water oxidation. *J. Energy Chem.* **2019**, *35*, 30-36.
14. Cherepy, N.J.; Liston, D.B.; Lovejoy, J.A.; Deng, H.; Zhang, J.Z. Ultrafast studies of photoexcited electron dynamics in  $\gamma$ - and  $\alpha$ -Fe<sub>2</sub>O<sub>3</sub> semiconductor nanoparticles. *J. Phys.*

- Chem. B.* **1998**, *102*, 770–776.
15. Barroso, M.; Mesa, C.A.; Pendlebury, S.R.; Cowan, A.J.; Hisatomi, T.; Sivula, K.; Grätzel, M.; Klug, D.R.; Durrant, J.R. Dynamics of photogenerated holes in surface modified  $\alpha$ - $\text{Fe}_2\text{O}_3$  photoanodes for solar water splitting. *PNAS*. **2012**, *109*, 15640–15645.
  16. Shen, S.; Guo, P.; Wheeler, D.A.; Jiang, J.; Lindley, S.A.; Kronawitter, C.X.; Zhang, J.Z.; Guo, L.; Mao, S.S. Physical and photoelectrochemical properties of Zr-doped hematite nanorod arrays. *Nanoscale* **2013**, *5*, 9867–9874.
  17. Kumar, P. M.; Borse, P.; Rohatgi, V. K.; Bhoraskar, S.V.; Singh, P.; Sastry, M. Synthesis and structural characterization of nanocrystalline aluminium oxide. *Mater. Chem. Phys.* **1994**, *36*, 354–358.
  18. Fan, Z.; Xu, Z.; Yan, S.; Zou, Z. Tuning the ion permeability of an  $\text{Al}_2\text{O}_3$  coating layer on  $\text{Fe}_2\text{O}_3$  photoanodes for improved photoelectrochemical water oxidation. *J. Mater. Chem. A* **2017**, *5*, 8402–8407.
  19. Fang, R.C.; Sun, Q.Q.; Zhou, P.; Yang, W.; Wang, P.F.; Zhang, D.W. High-performance bilayer flexible resistive random access memory based on low-temperature thermal atomic layer deposition. *Nanoscale Res. Lett.* **2013**, *8*, 1–7.
  20. Li, J.; Cushing, S.K.; Zheng, P.; Meng, F.; Chu, D.; Wu, N. Plasmon-induced photonic and energy-transfer enhancement of solar water splitting by a hematite nanorod array. *Nat. Commun.* **2013**, *4*, 1–8.
